# Supplementary material for: Effect of amide-triazole linkers on the electrochemical and biological properties of ferrocene-carbohydrate conjugates
Source: Royal Society of Chemistry journal article supplement (doi:10.1039/c2dt31927f), 2012-10-04
Supplement: c2dt31927f.pdf [file c2dt31927f.pdf]

## Supporting Information

### **Effect of amide-triazole linkers on the electrochemical and biological properties of ferrocene carbohydrate conjugates**

Sadanala Bhavya Deepthi,<sup>[a]</sup> Rajiv Trivedi,<sup>\*[a]</sup> Lingamallu Giribabu,<sup>[a]</sup> Pombala Sujitha<sup>[b]</sup> and C. Ganesh Kumar<sup>[b]</sup>

*\* Inorganic and Physical Chemistry Division, CSIR-Indian Institute of Chemical Technology (IICT), Hyderabad, Andhra Pradesh, India 500 607. Fax: (+) 91-40-2716 0921; Tel: (+) 91-40-27191667; E-mail: [trivedi@iict.res.in](mailto:trivedi@iict.res.in), [rtrajvi401@gmail.com](mailto:rtrajvi401@gmail.com)*

### Table of Contents

|                                                           |               |
|-----------------------------------------------------------|---------------|
| <sup>1</sup> H and <sup>13</sup> C spectra of <b>3a-f</b> | <b>S2-S8</b>  |
| UV-Vis spectra of ferrocene conjugates                    | <b>S9</b>     |
| Cyclic Voltammograms of ferrocene conjugates              | <b>S9-S17</b> |

Figure S1:  $^1\text{H}$  NMR spectra of **3a**

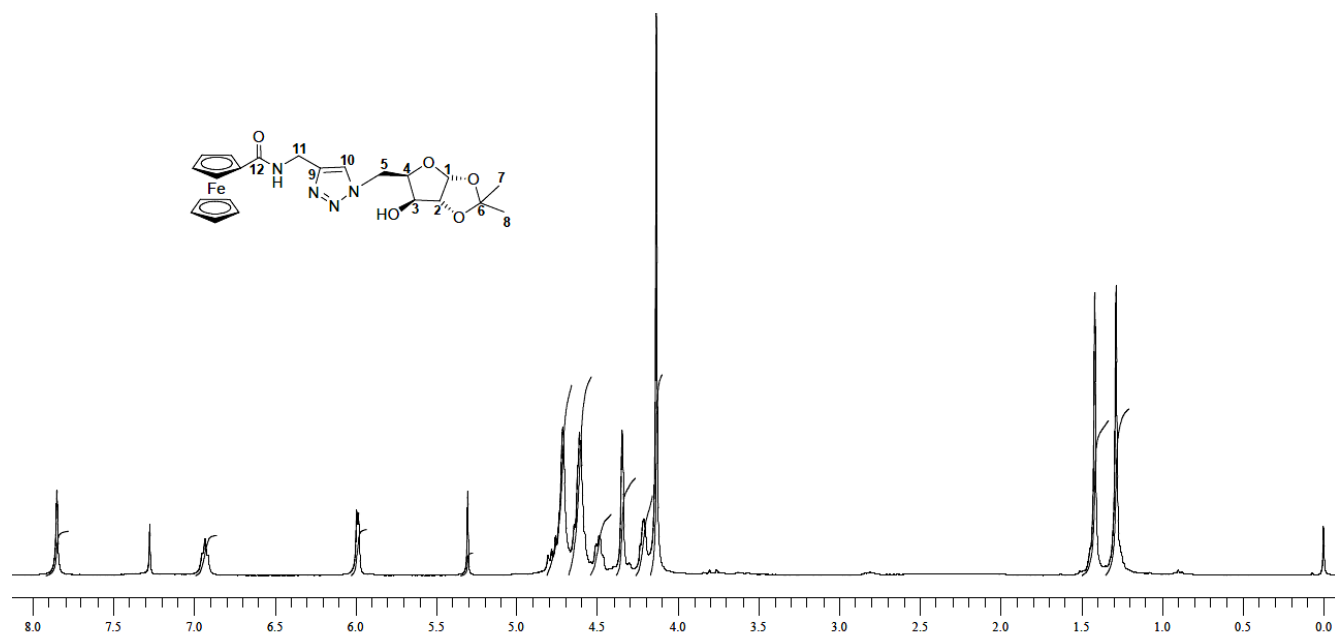

Figure S2:  $^{13}\text{C}$  NMR spectra of **3a**

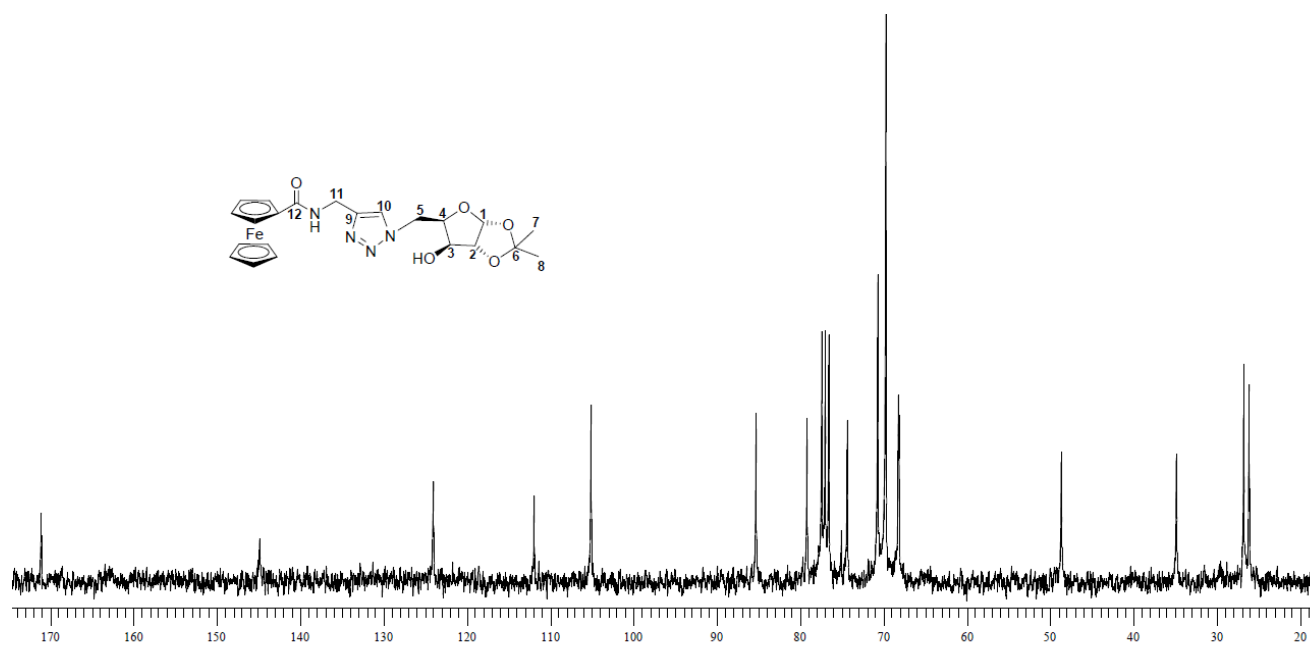

Figure S3:  $^1\text{H}$  NMR spectra of **3b**

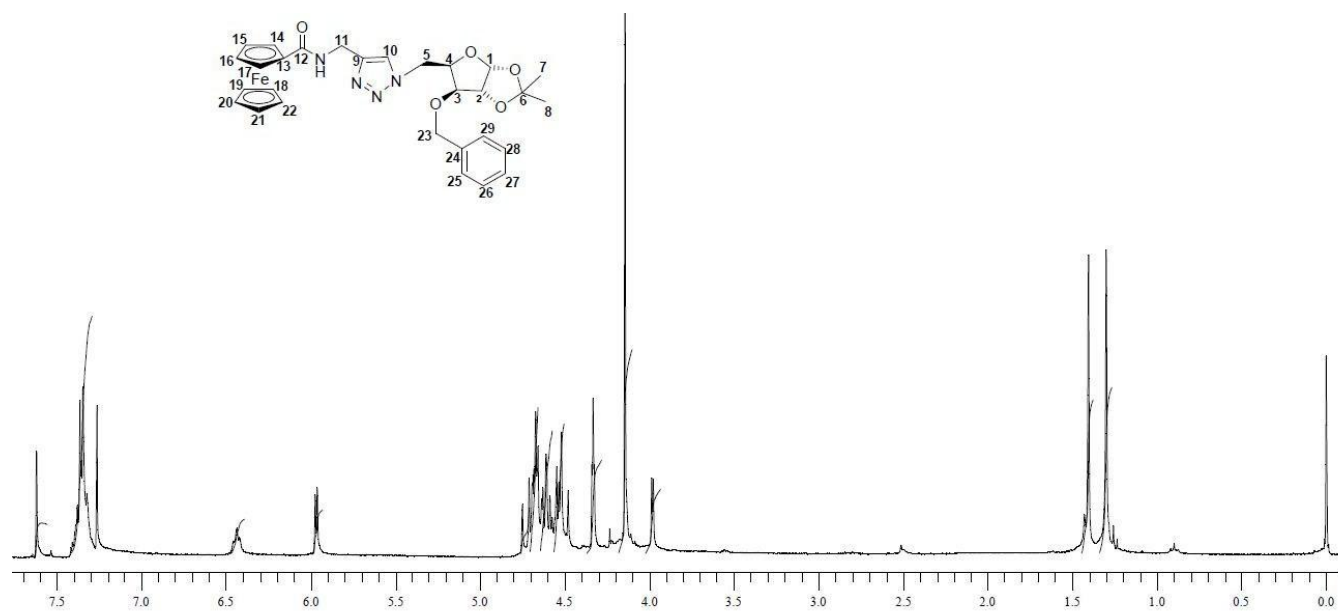

Figure S4:  $^{13}\text{C}$  NMR spectra of **3b**

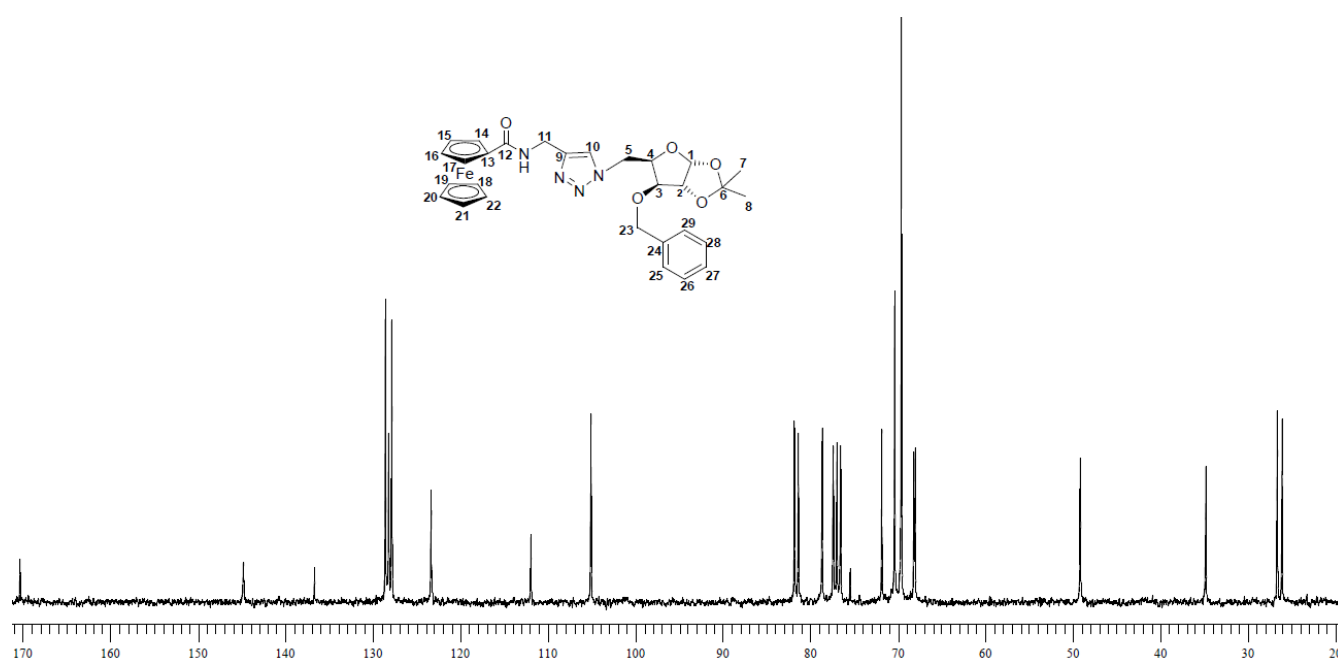

Fig S5:  $^1\text{H}$  NMR spectra of **3c**

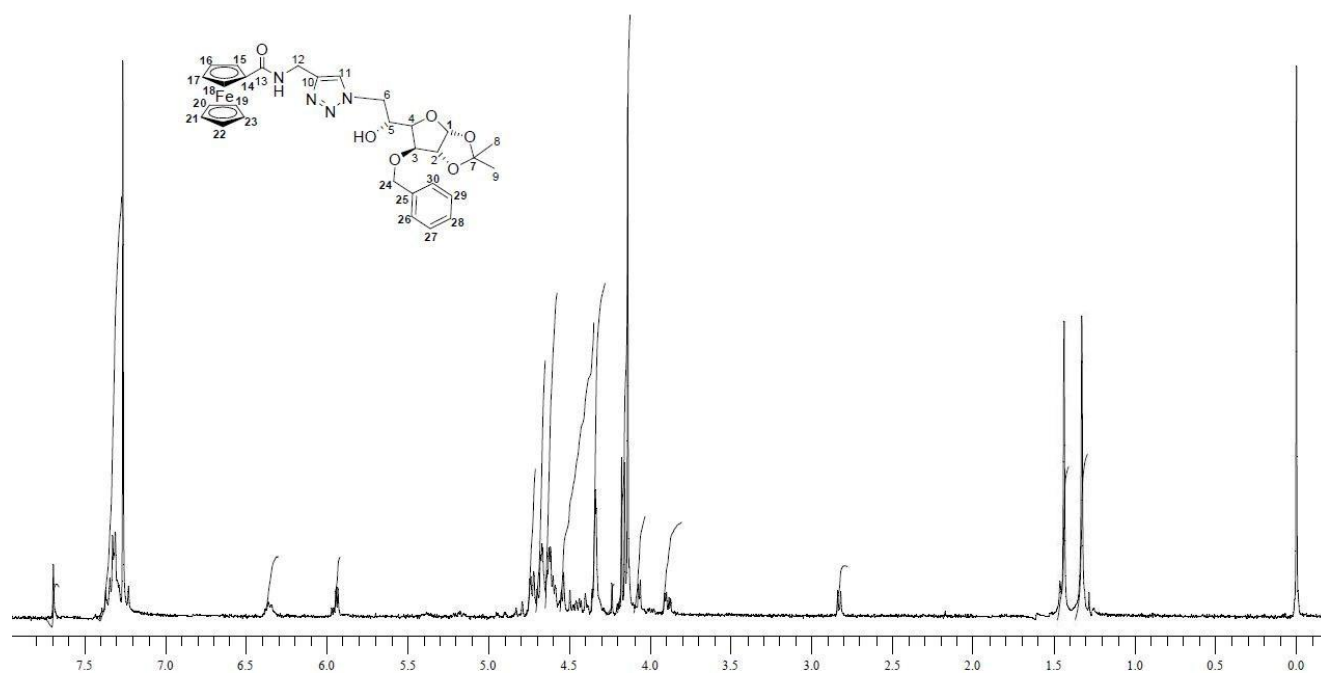

Fig S6:  $^{13}\text{C}$  NMR spectra of **3c**

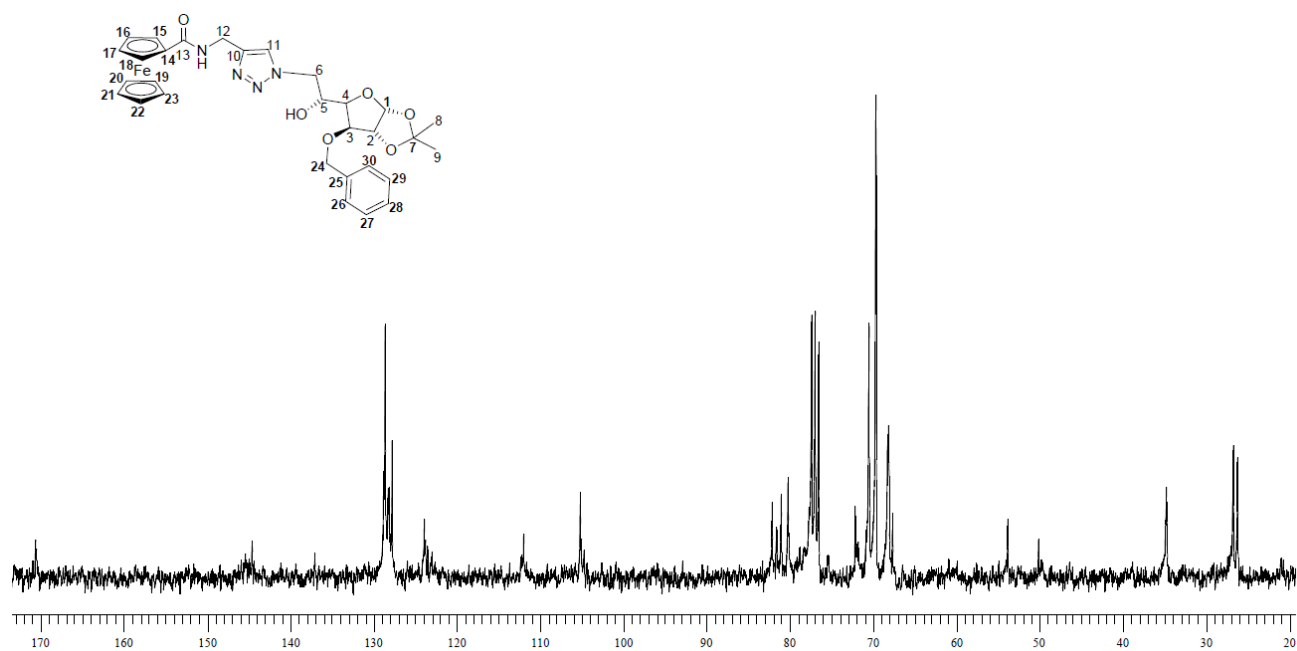

Figure S7:  $^1\text{H}$  NMR spectra of **3d**

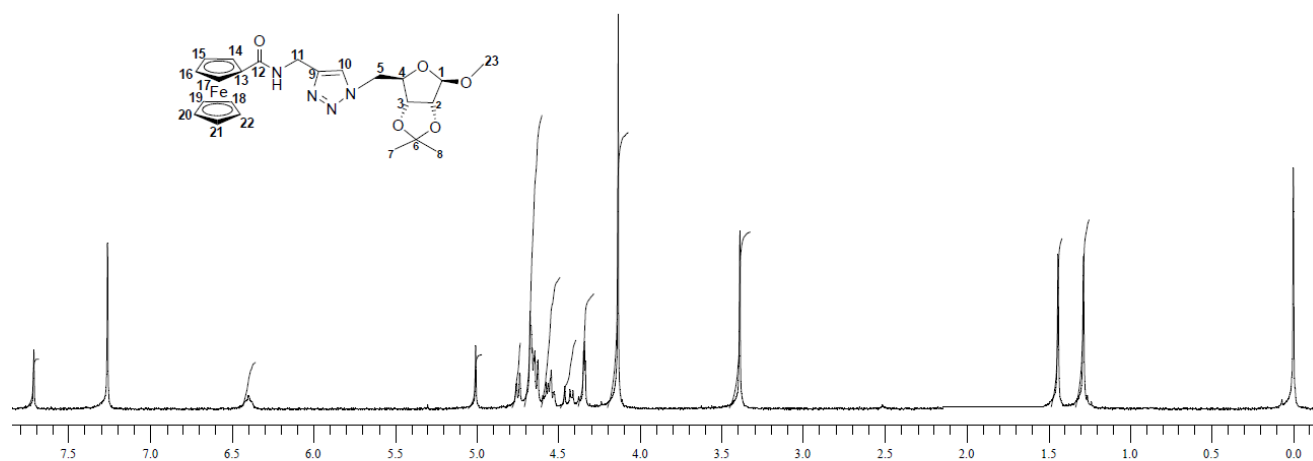

Figure S8:  $^{13}\text{C}$  NMR spectra of **3d**

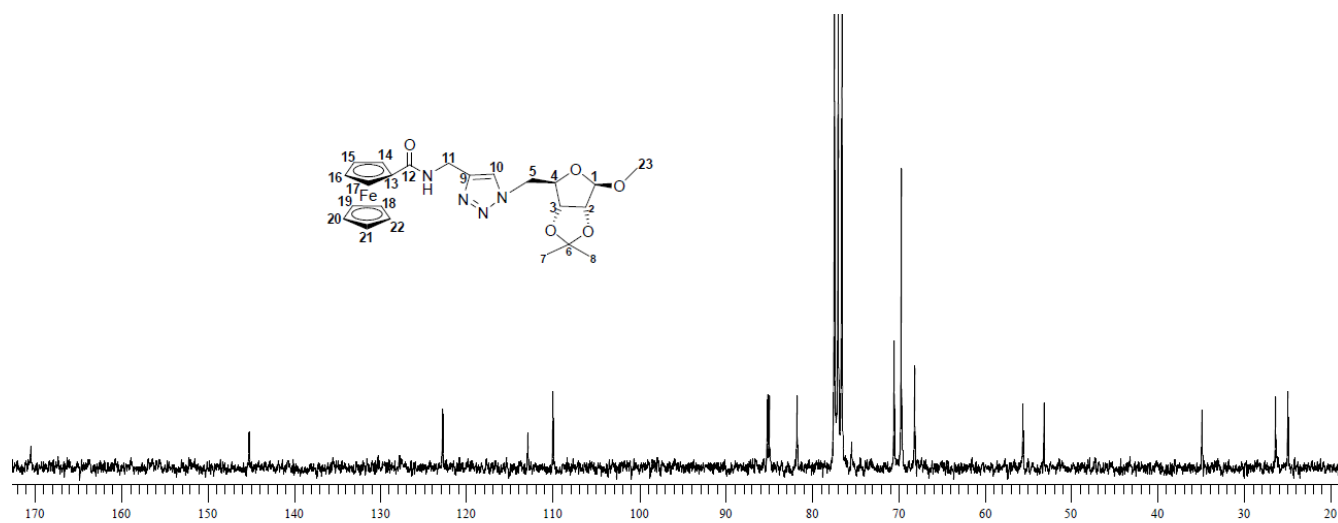

Figure S9:  $^1\text{H}$  NMR spectra of **3e**

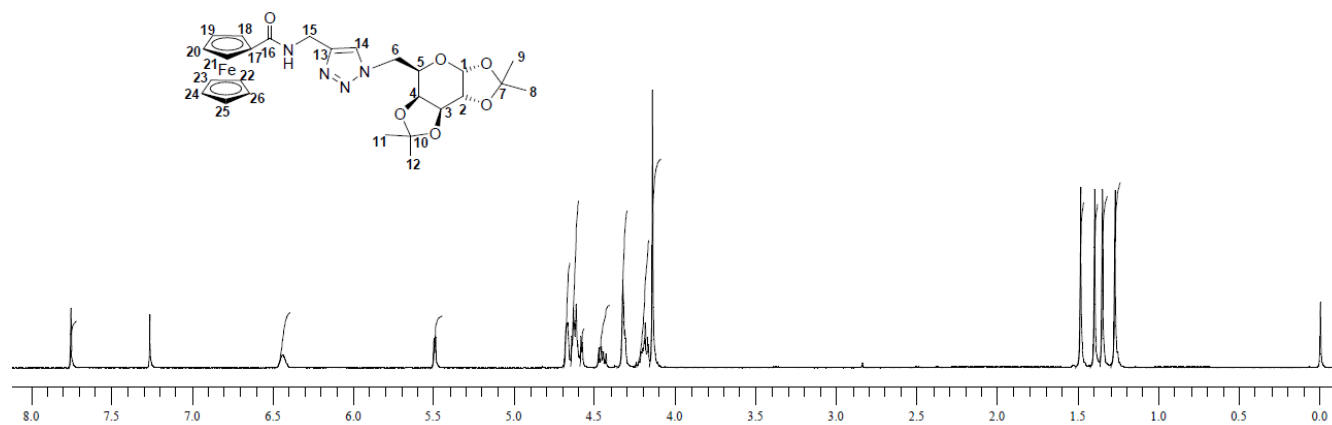

Figure S10:  $^{13}\text{C}$  NMR spectra of **3e**

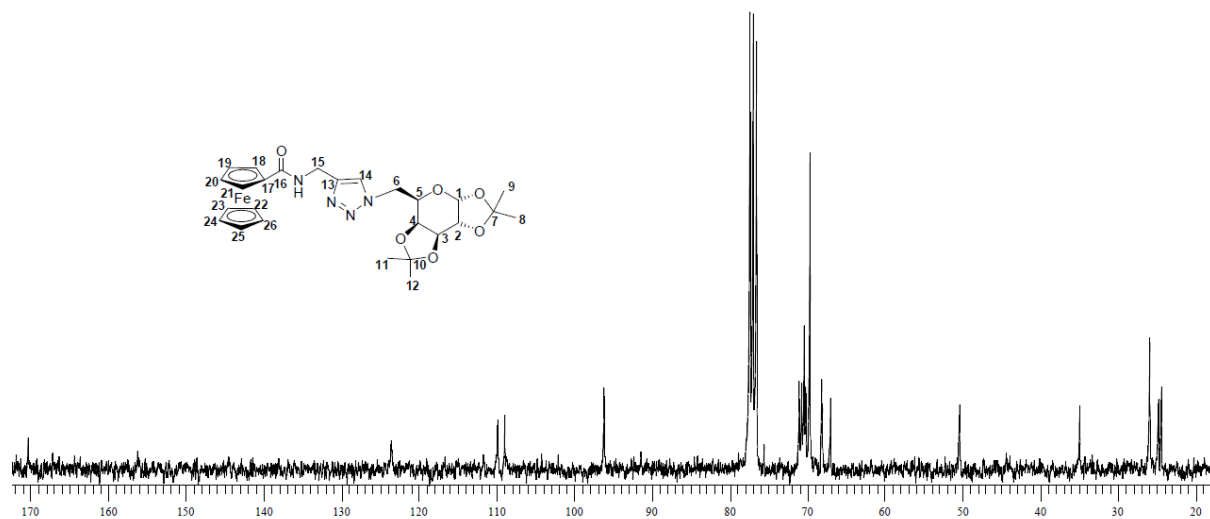

Figure S11:  $^1\text{H}$  NMR spectra of **3f**

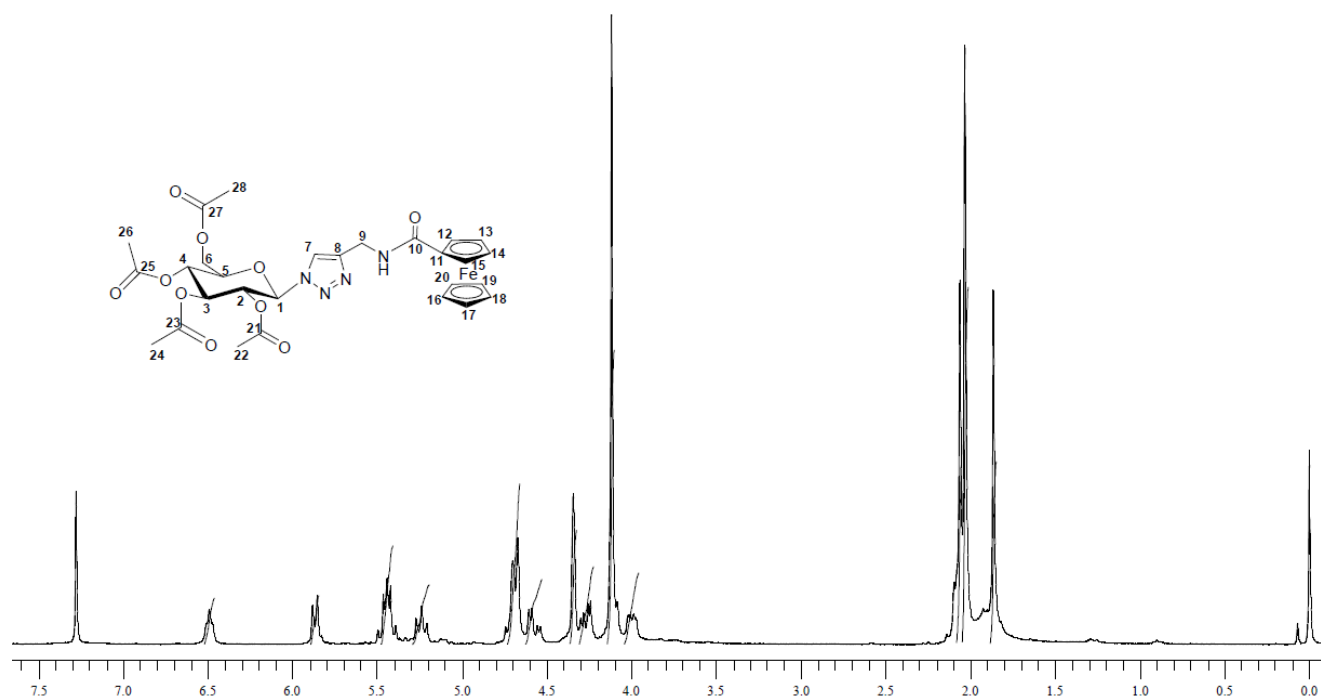

Figure S12:  $^{13}\text{C}$  NMR spectra of **3f**

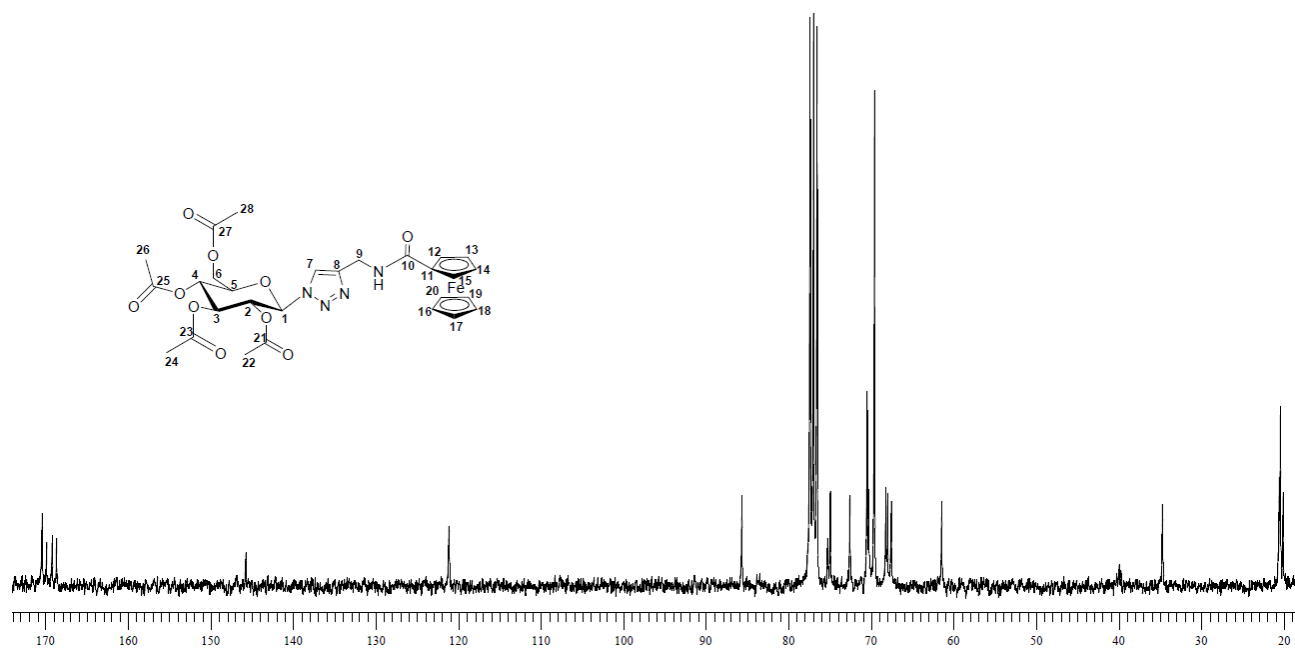

Figure S13:  $^1\text{H}$  NMR spectra of **3g**

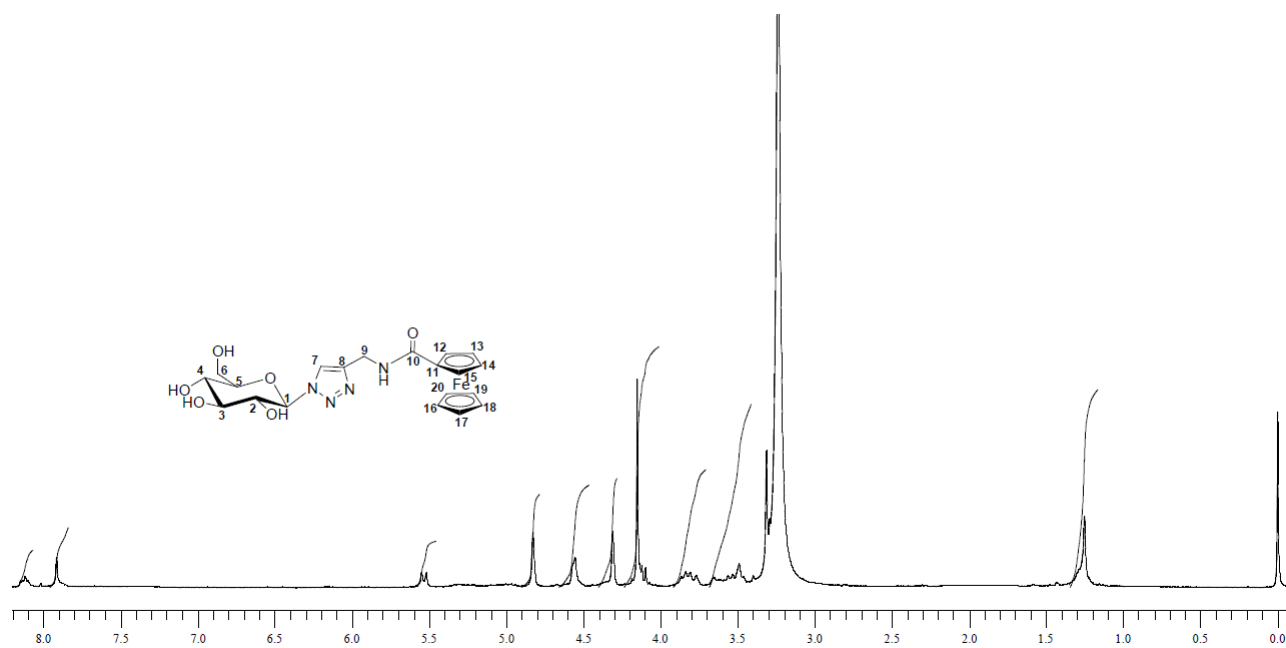

Figure S14:  $^{13}\text{C}$  NMR spectra of **3g**

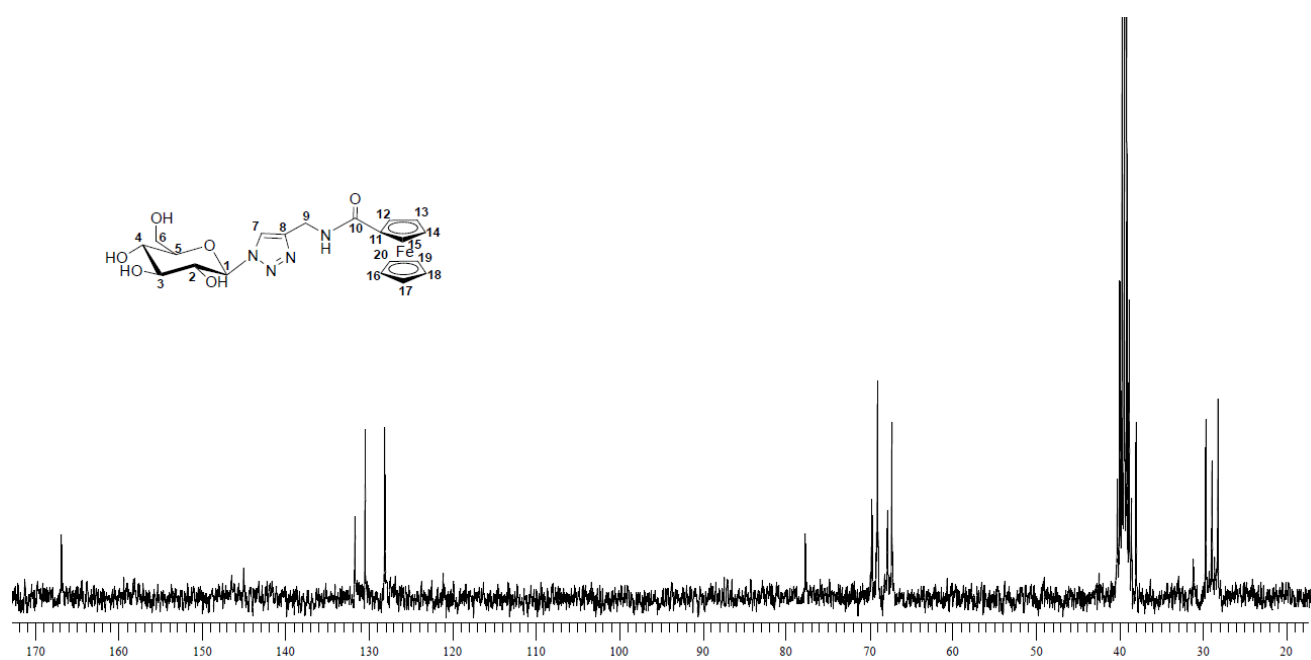



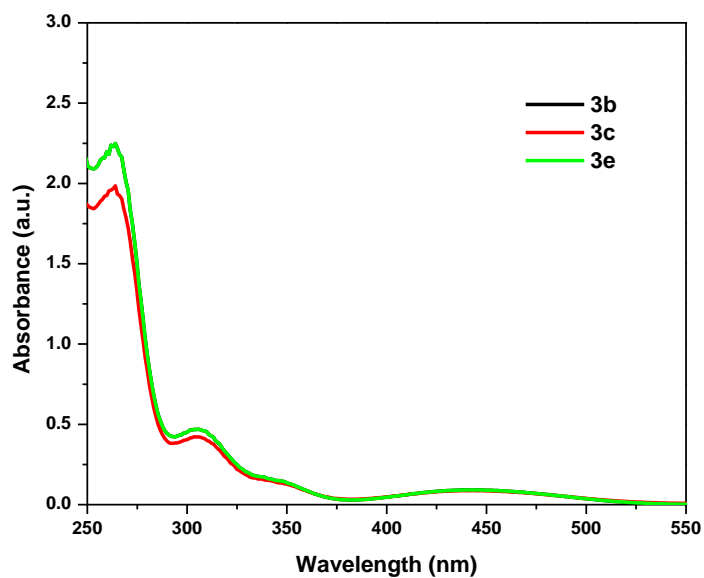

Figure S15. UV-Vis spectra of ferrocene conjugates **3b**, **3c**, **3e** in 0.5mM methanol solutions

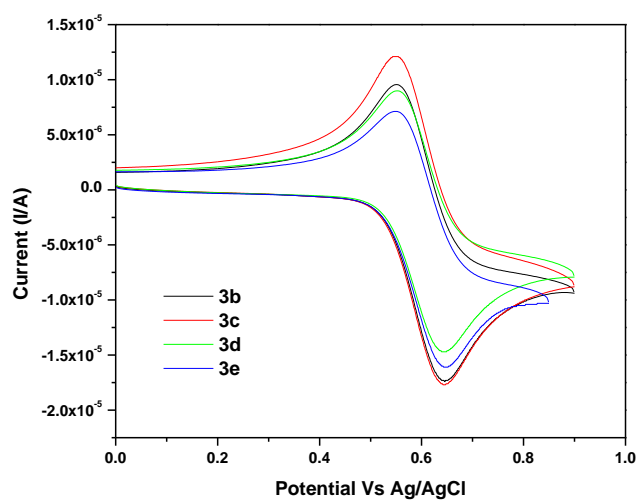

Figure S16. Cyclic voltammograms of ferrocene conjugates **3b**, **3c**, **3d** and **3e** in 1.0 mM methanol solution at 25 °C

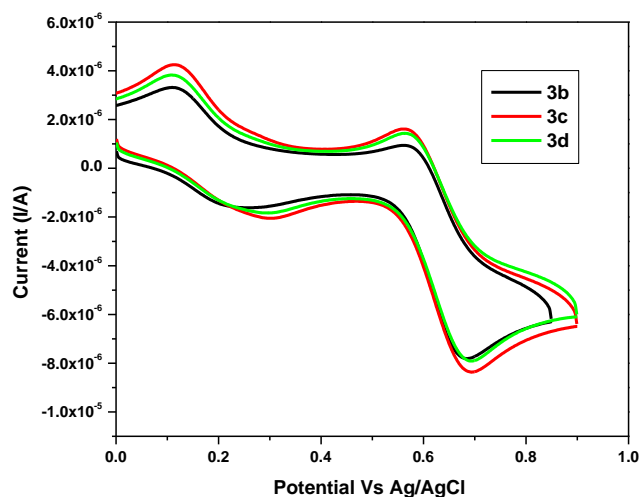

Figure S17. Cyclic voltammograms of ferrocene conjugates **3b**, **3c** and **3d** in 1.0 mM DMSO solution at 25 °C

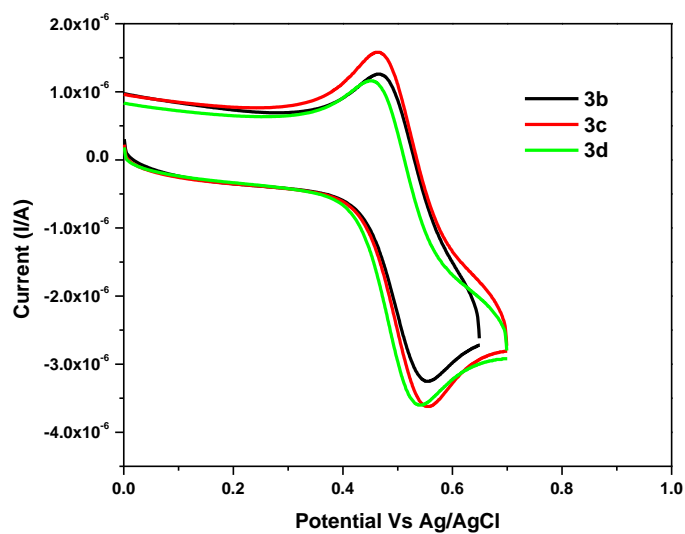

Figure S18. Cyclic voltammograms of ferrocene conjugates **3b**, **3c** and **3d** in 1.0 mM DMSO solution containing 0.1 M phosphate buffer (pH = 7.4) at 25 °C.

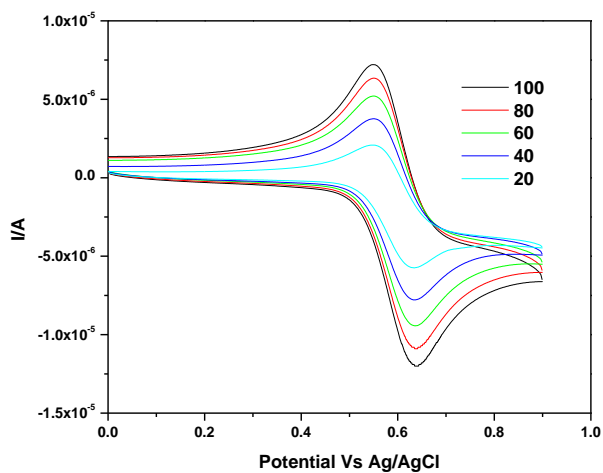

Figure S19. Cyclic voltammograms of **3a** in 1.0 mM methanol solution at different scan rates at 25 °C

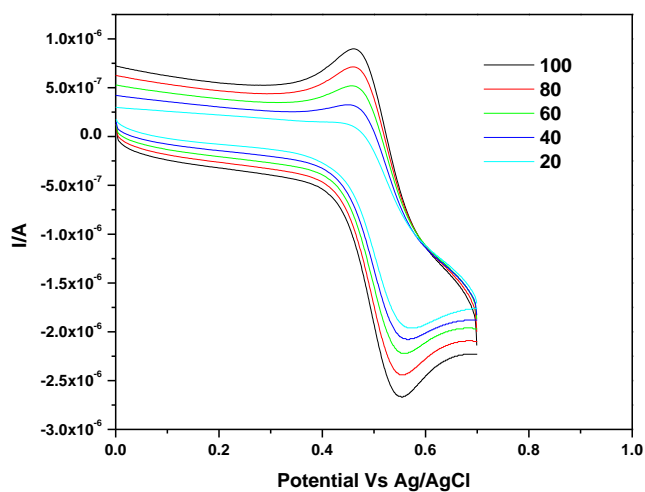

Figure S20. Cyclic voltammograms of **3a** in DMSO and phosphate buffer (1:1) solution at different scan rates at 25 °C

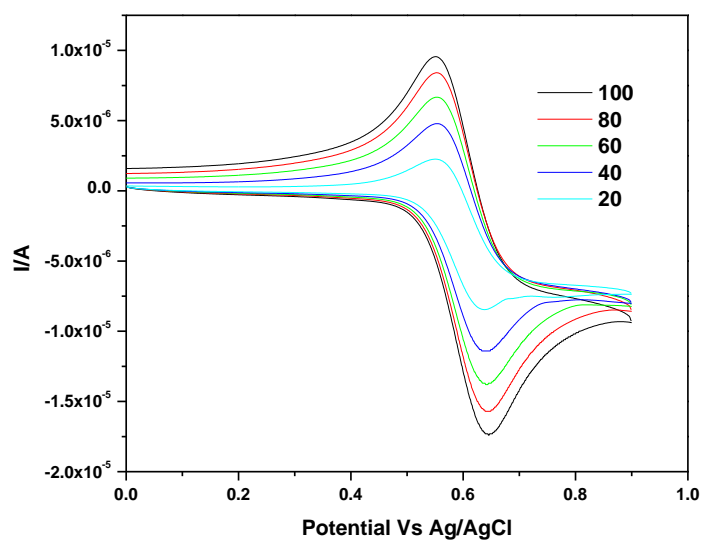

Figure S21. Cyclic voltammograms of **3b** in 1.0 mM methanol solution at different scan rates at 25 °C

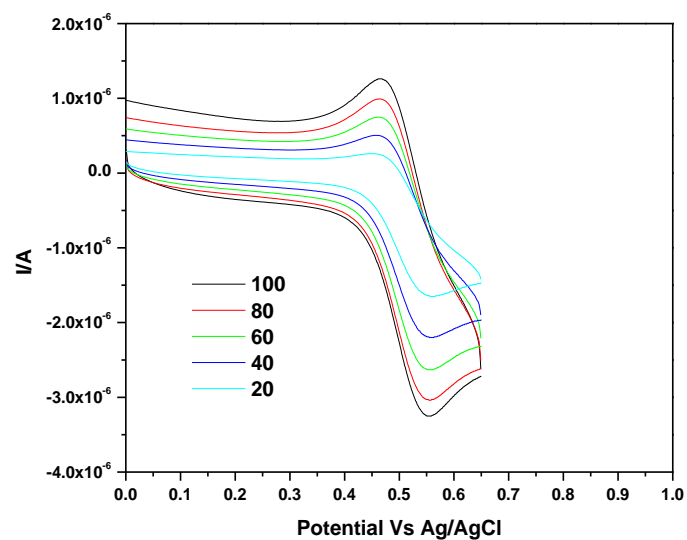

Figure S22. Cyclic voltammograms of **3b** in DMSO and phosphate buffer (1:1) solution at different scan rates at 25 °C

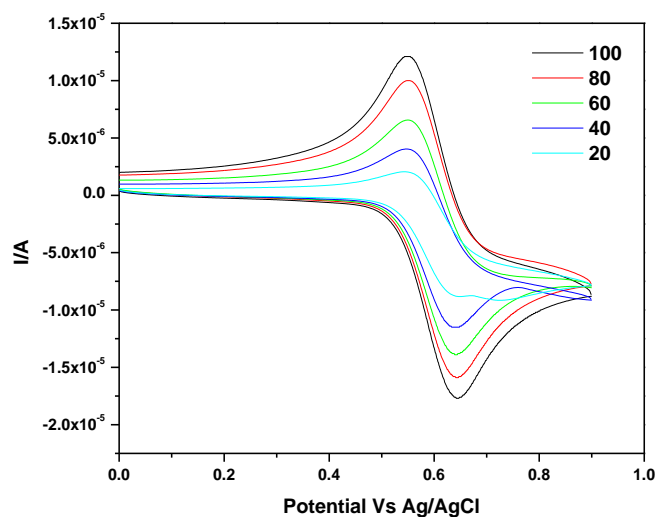

Figure S23. Cyclic voltammograms of **3c** in 1.0 mM methanol solution at different scan rates at 25 °C

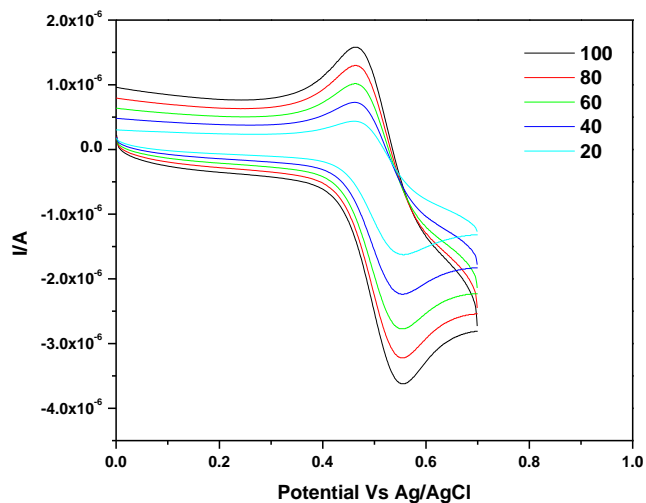

Figure S24. Cyclic voltammograms of **3c** in DMSO and phosphate buffer (1:1) solution at different scan rates at 25 °C

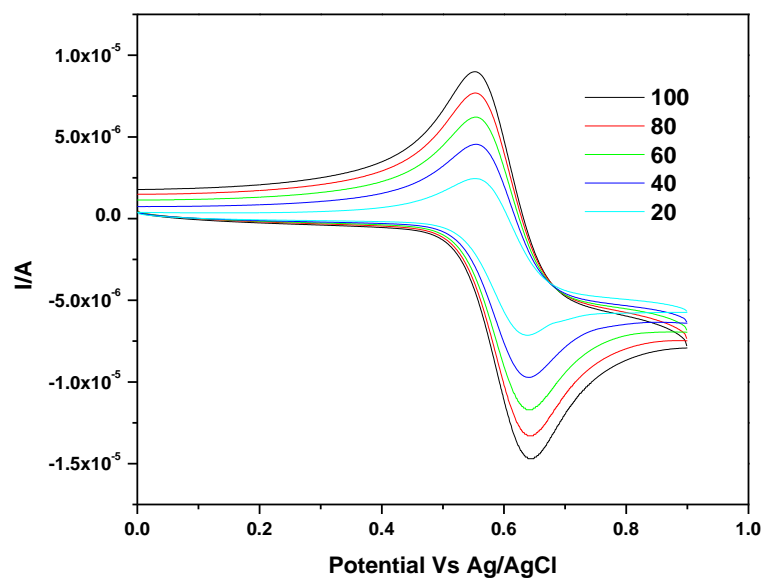

Figure S25. Cyclic voltammograms of **3d** in 1.0 mM methanol solution at different scan rates at 25 °C

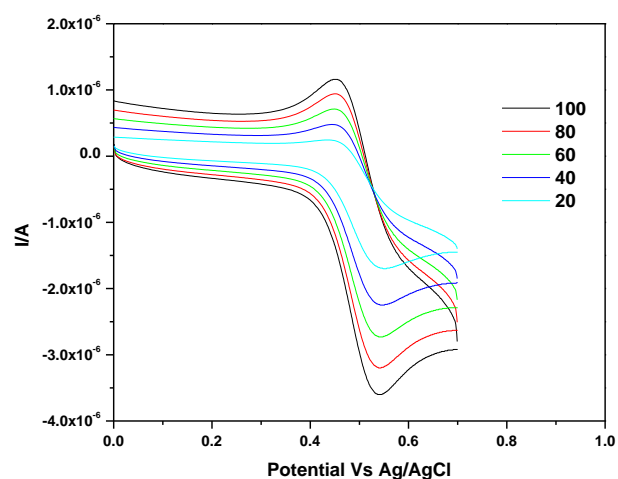

Figure S26. Cyclic voltammograms of **3d** in DMSO and phosphate buffer (1:1) solution at different scan rates at 25 °C

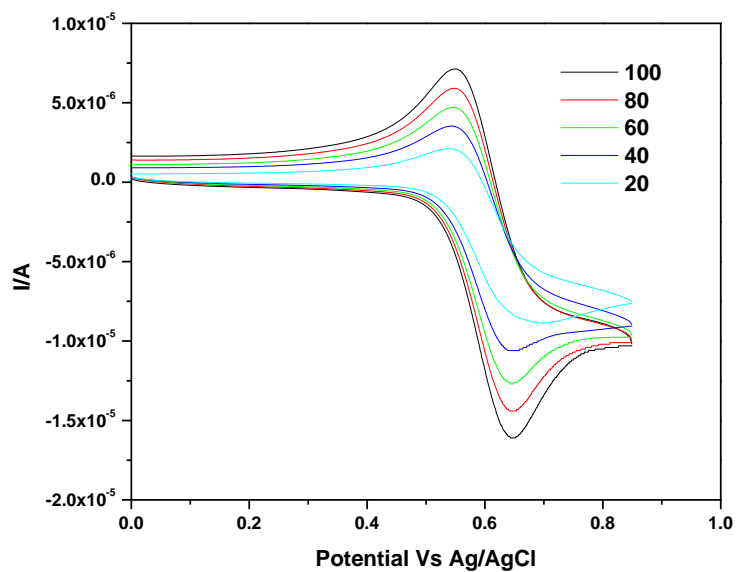

Figure S27. Cyclic voltammograms of **3e** in 1.0 mM methanol solution at different scan rates at 25 °C

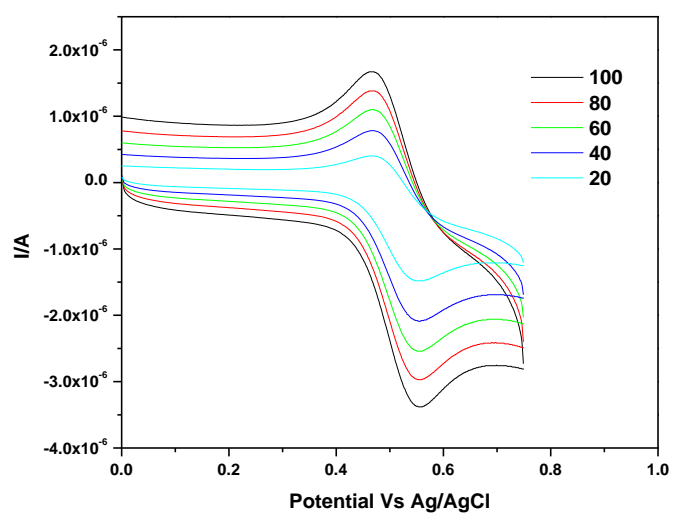

Figure S28. Cyclic voltammograms of **3e** in DMSO and phosphate buffer (1:1) solution at different scan rates at 25 °C

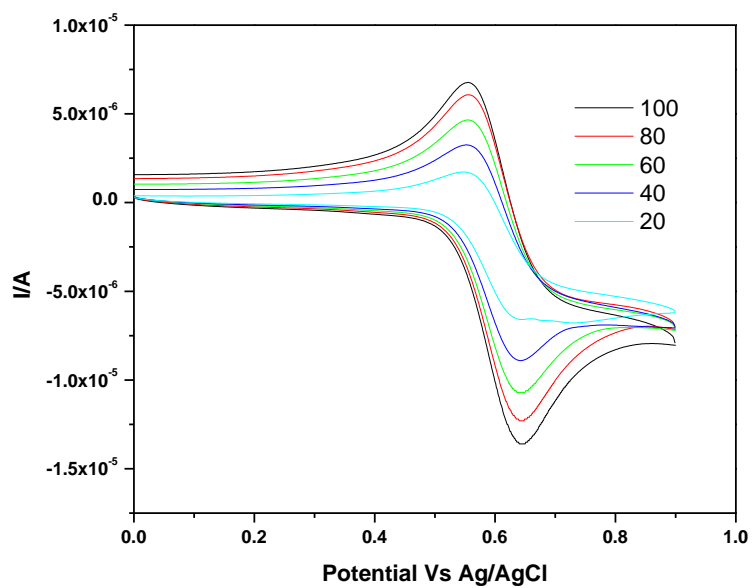

Figure S29. Cyclic voltammograms of **3f** in 1.0 mM methanol solution at different scan rates at 25 °C

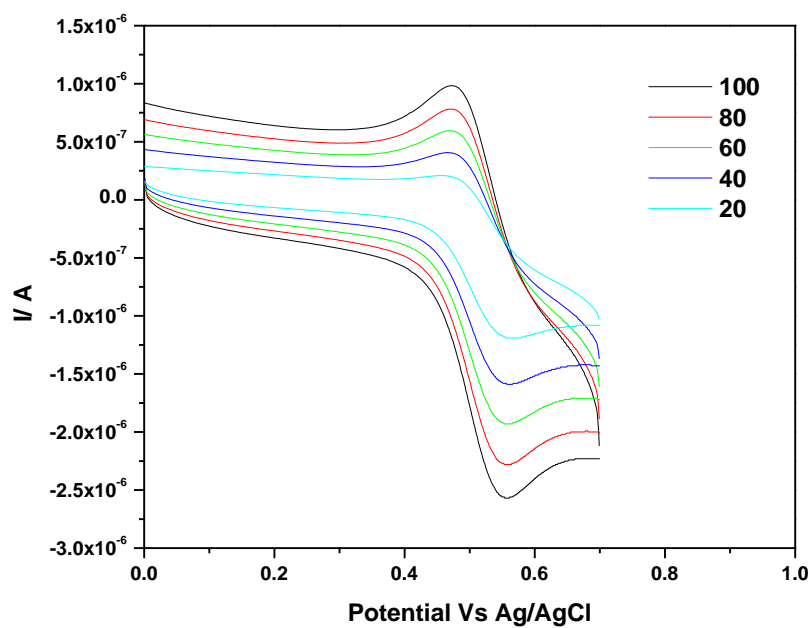

Figure S30. Cyclic voltammograms of **3f** in DMSO and phosphate buffer (1:1) solution at different scan rates at 25 °C



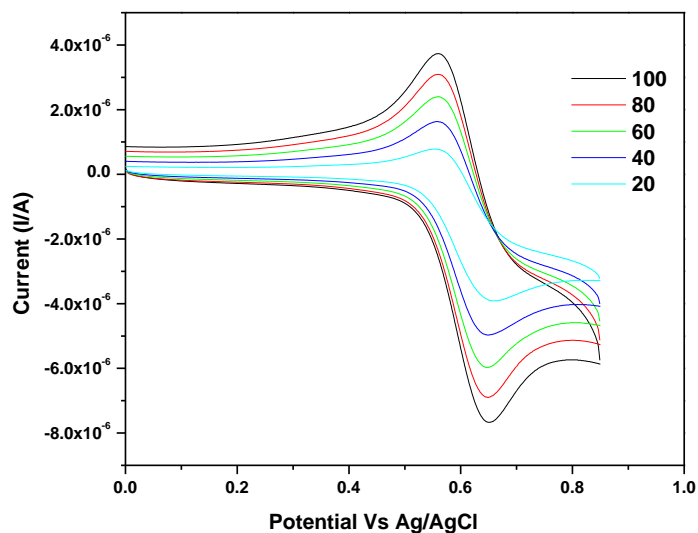

Figure S31. Cyclic voltammograms of **3g** in 0.5 mM methanol solution at different scan rates at 25 °C

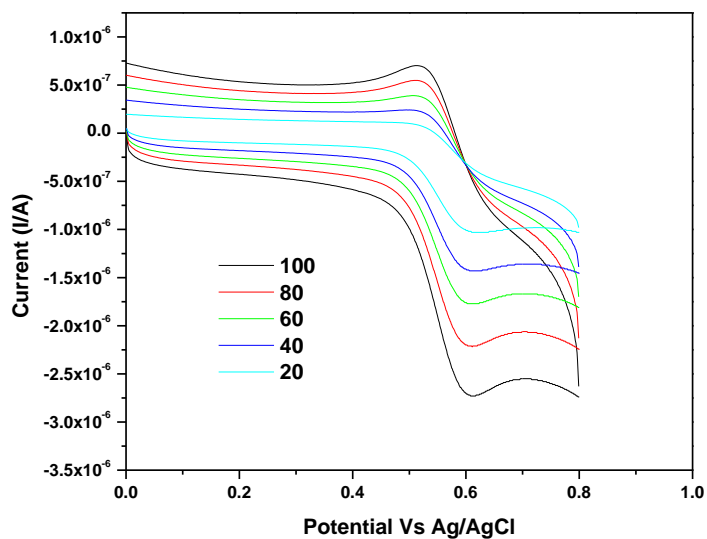

Figure S32. Cyclic voltammograms of **3g** in DMSO and phosphate buffer (1:1) solution at different scan rates at 25 °C
